# Supplementary material for: Predicting Suicide Attempts and Suicide Deaths Following Outpatient Visits Using Electronic Health Records
Source: Atypon-hosted journal article supplement (doi:10.1176/appi.ajp.2018.17101167), 2018-05-24
Supplement: appi.ajp.2018.17101167.ds001.pdf [file appi.ajp.2018.17101167.ds001.pdf]

**APPENDIX 1 – CONSISTENCY OF ICD9 E-CODE USE IN PARTICIPATING HEALTH SYSTEMS**

In the ICD9 coding system, diagnoses of self-inflicted injury/poisoning or injury/poisoning of undetermined intent require the recording of a separate E-code in addition to the primary injury or poisoning diagnosis. If this additional code is not recorded, it is not possible to classify an injury or poisoning event as self-inflicted, accidental, by assault, or having undetermined intent. Consequently, low rates of E-code use could lead to under-ascertainment of suicide attempts. As we have previously published (Liu et al, *Pharmacoepidemiology and Drug Safety*, 2014; 23:218), recording of E-codes varied widely across health systems in our Mental Health Research Network between 2000 and 2010. Mindful of this variation, health systems participating in this risk prediction modeling project were selected because of high rates of E-code use in 2010-2011. The table below shows the proportion of all injury and poisoning diagnoses in inpatient and emergency department settings during that period that were accompanied by any E-code diagnosis (accidental, assault, self-inflicted, or undetermined). These rates suggest that capture or ascertainment of self-inflicted injury/poisoning during the study period was incomplete, but the rate of incomplete ascertainment (false negative) due to failure to record E-code diagnoses was relatively low.

|           | KP Washington | KP Northwest | KP Hawaii | KP So. California | KP Colorado | Henry Ford | Health Partners |
|-----------|---------------|--------------|-----------|-------------------|-------------|------------|-----------------|
| Inpatient | 81%           | 75%          | 61%       | 77%               | 63%         | 90%        | 80%             |
| ED        | 76%           | 67%          | 64%       | 91%               | 66%         | 63%        | 87%             |

**APPENDIX 2 – VALIDITY OF E-CODE DIAGNOSES OF DEFINITE AND UNDETERMINED SELF-INFLICTED INJURY IN PARTICIPATING HEALTH SYSTEMS**

Some previous research suggests that accuracy of E-code diagnoses of self-inflicted injury/poisoning is poor in some health care systems or settings. Given that concern, we reviewed full-text electronic medical records for a sample of encounters from participating health systems in 2012 and 2013 receiving E-code diagnoses of definite self-inflicted injury/poisoning or injury/poisoning of undetermined intent. Trained chart reviewers determined whether text of provider notes clearly documented intentional self-inflicted injury or poisoning (e.g. “cut self”, “took overdose”). Results are shown in the table below. In the full sample, the rate of confirmation for encounters coded as self-inflicted was 79%, and the confirmation rate for encounters coded as undetermined intent was 71%. When the sample was limited to encounters by patients with recent mental health diagnosis or treatment (the criteria for inclusion in this risk prediction study), confirmation rates were 91% for events coded as self-inflicted and 80% for events coded as undetermined intent. These findings suggest low false-positive rates in these health systems during the study period when including both self-inflicted and “undetermined” intent events as probable suicide attempts.

| E-Code Diagnosis | Total           |                  |                  | With Recent Mental Health Diagnosis or Treatment |                  |                  |
|------------------|-----------------|------------------|------------------|--------------------------------------------------|------------------|------------------|
|                  | Number Reviewed | Number Confirmed | Rate (95% CI)    | Number Reviewed                                  | Number Confirmed | Rate (95% CI)    |
| Self-inflicted   | 300             | 238              | 79% (74% to 83%) | 229                                              | 208              | 91% (86% to 94%) |
| Undetermined     | 150             | 106              | 71% (63% to 77%) | 123                                              | 98               | 80% (71% to 86%) |

### APPENDIX 3 – CHANGES IN CODING OF SELF-INFLICTED INJURY WITH TRANSITION FROM ICD9 TO ICD10

Coding of intent for injuries and poisonings changed significantly from the ICD9 to the ICD10 diagnostic system. Rather than using separate E-codes, the ICD10 system requires specific coding of intent within the primary diagnosis. One of our recent publications (Stewart et al, *Psychiatric Services*, 2017; 68:215) describes changes in recording of intent for injury/poisoning encounters across this transition in health systems participating in this risk prediction study. The figure from that publication is reproduced below. With the transition to ICD10 coding, the population rate of injury/poisoning encounters coded as undetermined intent decreased by more than half while the rate of injury/poisoning encounters coded as definitely self-inflicted increased by more than half. The total of those two rates (i.e. the definition of probable suicide attempt used for our analyses) was stable. We interpret this as evidence that most of the injury/poisoning events coded as having undetermined intent under the ICD9 E-code system were actually self-inflicted injuries or poisonings – and are now more accurately captured under the ICD10 system. We believe this argues strongly for use of the broader definition (including “undetermined” diagnoses) for our primary analyses.

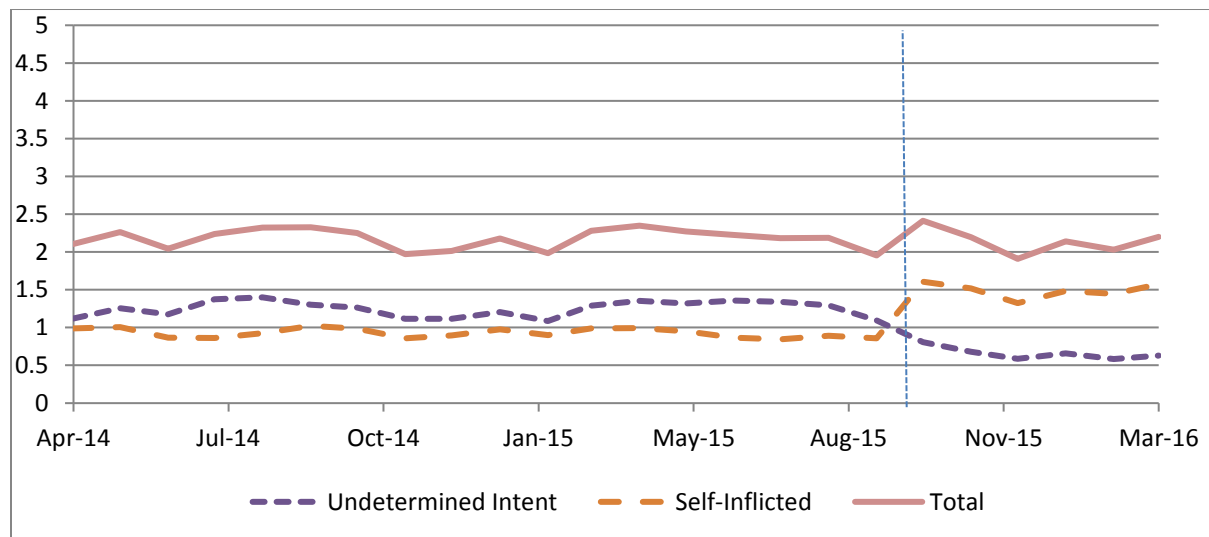

This finding also provides additional support for the sensitivity of our outcome definition. The switch from use of separate E-codes (which could be omitted) in ICD9 to mandatory coding of intent in ICD10 had no effect on the total rate of injuries and poisonings coded as either self-inflicted or having undetermined intent. Stability of the overall rate implies that failure to record E-code diagnoses did not result in significant under-counting of self-harm during the study period.

#### **APPENDIX 4 – SENSITIVITY ANALYSES LIMITED TO EVENTS CODED AS DEFINITELY SELF-INFLICTED**

##### Regarding Probable Suicide Attempts:

At the Kaiser Permanente Washington site, detailed data regarding ICD9 cause of injury codes are available for sensitivity analyses. At that site, 74% of originally included suicide attempt events were coded as definitely self-inflicted and 26% were coded as having undetermined intent. Using those data, we compared the performance of our final models for predicting broadly-defined suicide attempts (our original definition) and narrowly-defined suicide attempts (only injuries and poisonings classified as definitely self-inflicted) Results of those comparisons in the samples of mental health specialty and primary care visits are shown below.

MH Visits, Suicide attempt risk at 90 days

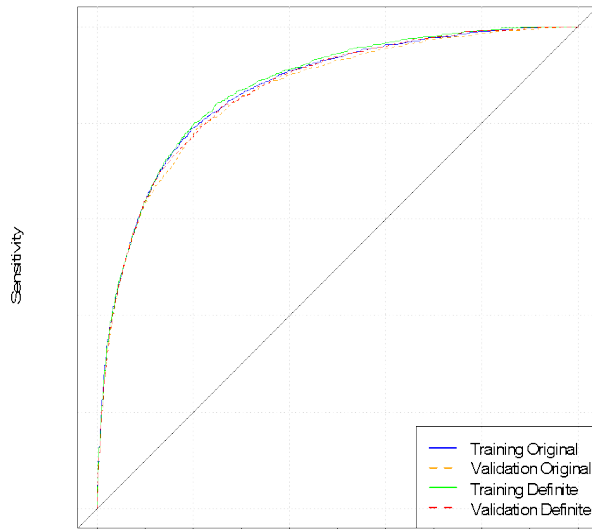

1 - Specificity

PC Visits, Suicide attempt risk at 90 days

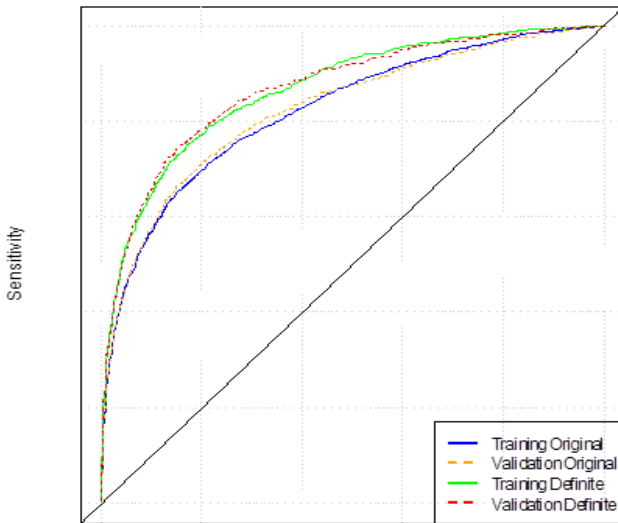

1 - Specificity

In the mental health specialty sample (left graph), predictive accuracy was essentially identical when using a broad or narrow definition. In the primary care sample (right graph), predictive accuracy was moderately superior for narrowly defined attempts. These findings suggest that our primary analyses using a broader definition give a conservative view of prediction model accuracy. Because our data suggest that the narrower definition of probable suicide attempt would miss one-quarter of true events, we believe our primary analyses should still consider the broader definition.

### Regarding Probable Suicide Deaths:

At the Kaiser Permanente Washington site, detailed data regarding ICD10 cause of death codes are available for sensitivity analyses. At that site, 92% of originally included suicide death events were coded as definitely self-inflicted and 8% were coded as having undetermined intent. Using those data, we compared the performance of our final models for predicting broadly-defined suicide deaths (our original definition) narrowly-defined suicide deaths (only injuries and poisonings classified as definitely self-inflicted). For prediction of suicide death following a mental health specialty visit, C-statistics in the validation sample were 0.84 using our original definition and 0.83 using the narrower definition. For prediction of suicide death following an primary care visit with mental health diagnosis, C-statistics in the validation sample were 0.83 using our original definition and 0.82 using the narrower definition.

## APPENDIX 5 – SENSITIVITY OF FINDINGS TO AVAILABILITY OF HISTORICAL DATA

As shown in Table 1, at least five years of records data were available for 56% of mental health specialty visits and 56% of primary care visits. At least one year of records data were available for 87% of mental health specialty visits and 85% of primary care visits. Some predictors selected (Table 2) did consider diagnoses, prescriptions, or utilization up to five years prior to the sampled visit. Consequently, some predictor data could be missing or unobserved for visits preceded by less than five years of prior enrollment. We conducted secondary analyses, examining performance of our final models in the subgroup with at least five years of prior records data. Results are shown below. Model performance was not meaningfully different in those with complete prior data compared to the full sample. This is not surprising, given that models were developed or trained a real-world sample that included patients with incomplete prior data. Because this real-world population (all visits regardless of prior enrollment) is the group to which our results would be applied, we believe that our primary analyses should include all eligible visits, regardless of prior enrollment. Restricting models to patients with long duration of health system enrollment could both introduce bias and reduce generalizability.

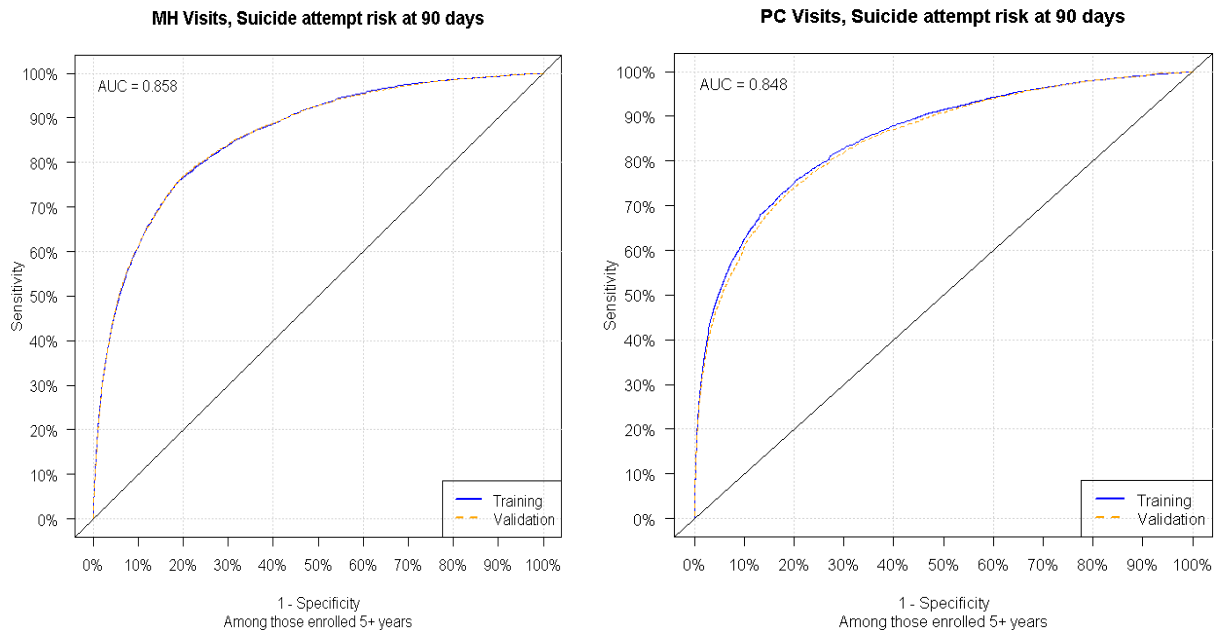

## APPENDIX 6 – GENERALIZABILITY OF FINDINGS AFTER TRANSITION TO ICD-10 DIAGNOSES

The transition to the ICD-10 diagnostic system in October of 2015 could affect both recording of suicide attempt diagnoses and recording of mental health and substance use disorder variables contributing to predictor variables. While the classification structure for mental health and substance use disorder diagnoses did not change significantly from ICD-9 to ICD-10, the scheme for coding of self-harm and injury/poisoning of undetermined intent changed significantly.

We have examined rates of diagnoses for each of our predictor variables across the transition to ICD-10. As shown in the two graphs below (one above for more common diagnoses and one below for less common diagnoses) rates were quite stable across the transition in October, 2015

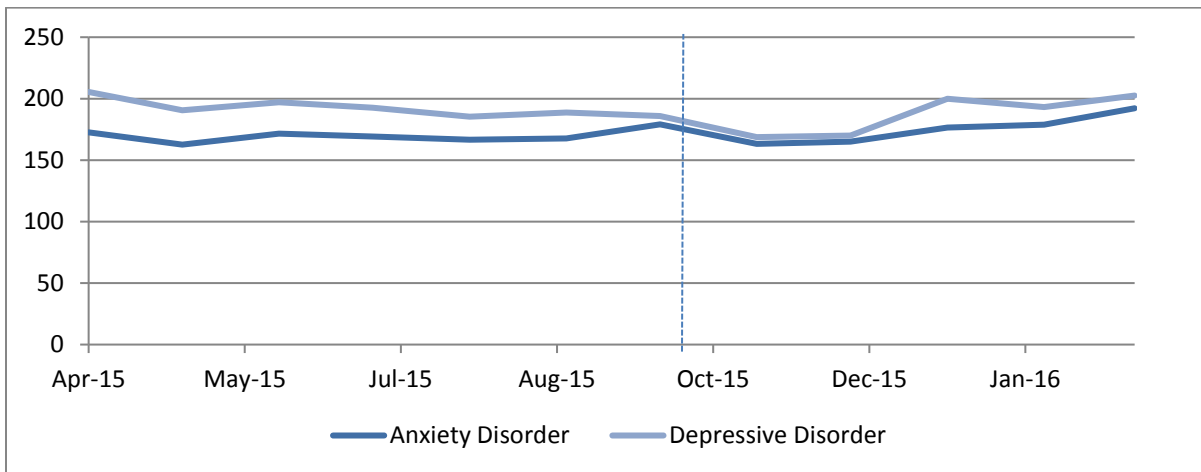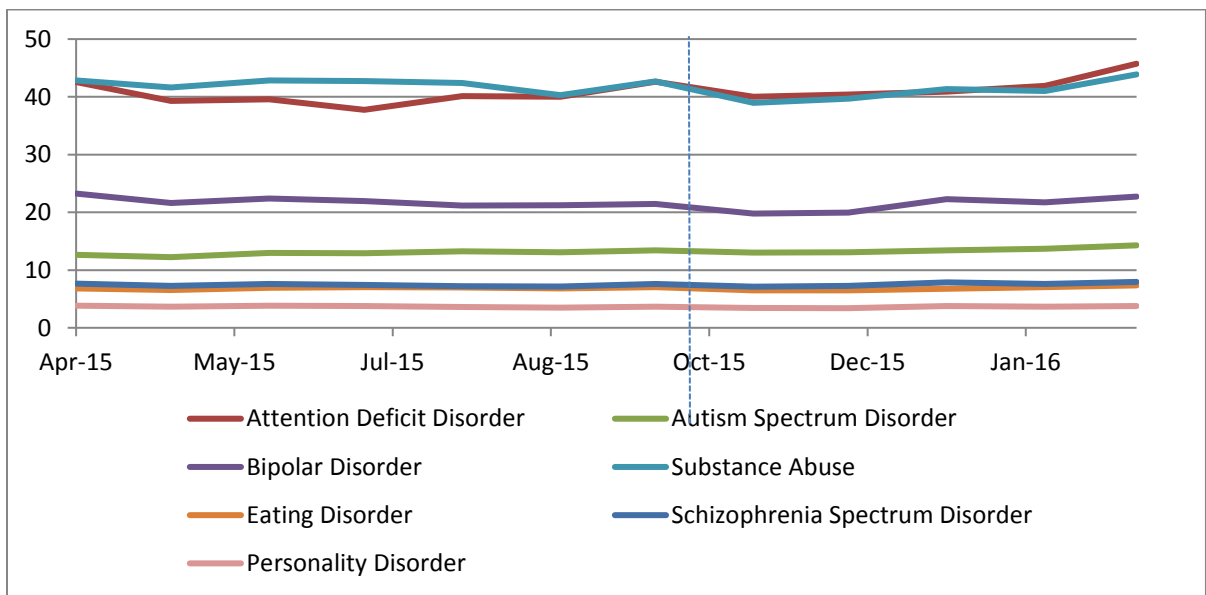



The graph below from one of our recent publications (Stewart et al, *Psychiatric Services*, 2017; 68:215) describes changes in recording of intent for injury/poisoning encounters across the ICD-9 to ICD-10 transition in health systems participating in this risk prediction study. With the transition to ICD10 coding, the population rate of injury/poisoning encounters coded as undetermined intent decreased by more than half while the rate of injury/poisoning encounters coded as definitely self-inflicted increased by more than half. The total of those two rates, however, was stable. Consequently, we observe no change in the rate of diagnoses of probable suicide attempt using our specification (including both diagnoses of definite self-harm and diagnoses of injury/poisoning with undetermined intent).

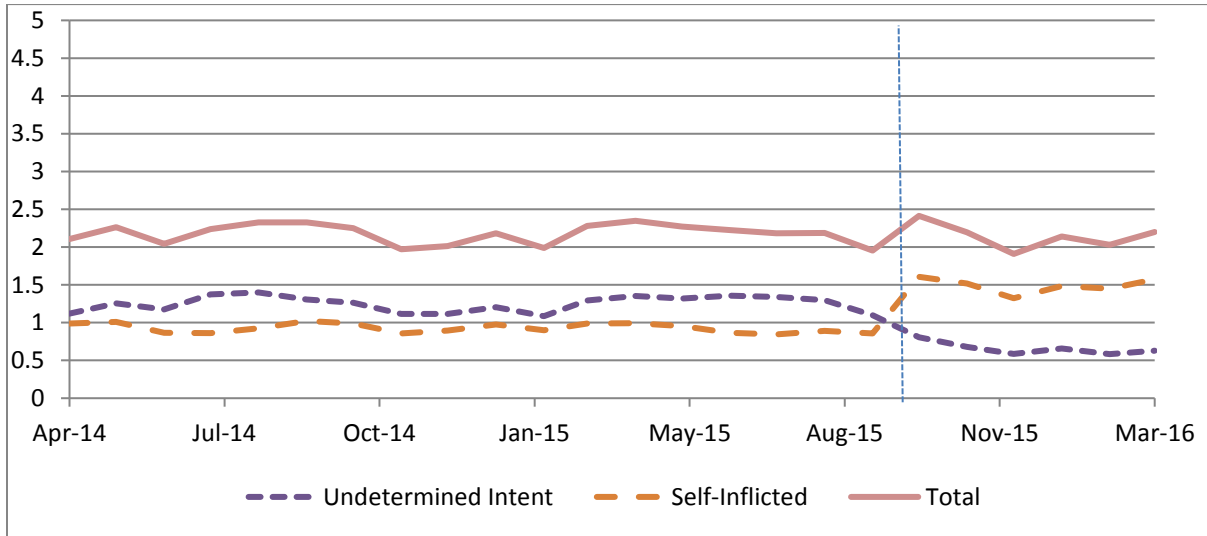

Given this stability in rates of both predictor and outcome diagnoses, we expect that our findings regarding accuracy of risk prediction models will also apply after the transition to ICD10. That expectation, however, would certainly require confirmation using new data from October 2015 forward. Our team expects to extract those data in early 2018.

## APPENDIX 7 – SENSITIVITY ANALYSES USING 30-DAY OUTCOME WINDOW

Sensitivity analyses repeated model development and validation using a 30-day window for ascertainment of suicide attempts and suicide deaths. Strongest positive predictors selected are shown in the table below. Comparison with manuscript Table 2 shows that that predictors selected using a 30-day outcome window were quite similar to those selected using a 90-day window.

| SUICIDE ATTEMPT FOLLOWING:                                   |                                                   | SUICIDE DEATH FOLLOWING:                                     |                                                      |
|--------------------------------------------------------------|---------------------------------------------------|--------------------------------------------------------------|------------------------------------------------------|
| MENTAL HEALTH SPECIALTY VISIT<br>(of 78 predictors selected) | PRIMARY CARE VISIT<br>(of 90 predictors selected) | MENTAL HEALTH SPECIALTY VISIT<br>(of 29 predictors selected) | PRIMARY CARE VISIT<br>(of 12 predictors selected)    |
| Depression diagnosis in last 5 yrs.                          | Suicide attempt diagnosis in last 5 yrs.          | Mental health ER visit in last 3 mos                         | Mental health inpatient stay in last 3 mos.          |
| Age 13-17 with Female                                        | Depression diagnosis in last 5 yrs.               | 2 <sup>nd</sup> Gen. Antipsychotic Rx in last 5 years        | Mental health ER visit in last 3 mos.                |
| Drug abuse diagnosis in last 5 yrs.                          | Drug abuse diagnosis in last 5 yrs.               | Hypnotic Drug Rx. in last year.                              | Mental health ER visit in last year.                 |
| PHQ-9 Item 9 score =3 in last 90 days                        | Suicide attempt diagnosis in last 3 mos.          | Benzodiazepine Rx. in last 3 mos.                            | PHQ-9 Item 9 score=3 with PHQ8 score                 |
| Drug use disorder Diag. in last 5 yrs                        | Age 13-17 with Female                             | Mental health inpatient stay in last year                    | Number of PHQ9 responses in last 90 days             |
| Suicide attempt diagnosis in last year                       | PHQ-9 Item 9 score =3 in last year                | Mental health inpatient stay in last 3 mos                   | Suicide attempt diagnosis in last 5 yrs.             |
| Mental health inpatient stay in last year                    | Suicide attempt diagnosis in last year            | Antidepressant Rx. in last 3 mos.                            | Depression diagnosis in last 5 yrs.                  |
| Suicide attempt diagnosis in last 3 mos.                     | Personality disorder diag. in last 5 yrs.         | Charlson Comorbidity Score                                   | PHQ-9 item 9 score=2 with Age                        |
| Antidepressant Rx. in last yr.                               | Alcohol use diagnosis in last 5 yrs.              | Number of PHQ9 responses in last 90 days                     | PHQ-8 score=3 with Age                               |
| Personality disorder diag. in last 5 yrs.                    | Anxiety disorder diag. in last 5 yrs.             | PHQ-9 item 9 score = 1 with Age                              | Suicide attempt diag. in past 5 yrs with PHQ8 score  |
| Benzodiazepine Rx. in last 3 mos.                            | Benzodiazepine Rx. in last 3 mos.                 | PHQ-9 item 9 score = 3 with Age                              | PHQ-9 Item 9 score=3 with Charlson Comorbidity Score |
| PHQ-9 Item 9 score=2 in last year                            | Eating Disorder diagnosis in last 5 yrs.          | Suicide attempt diagnosis in last 5 yrs.                     | Fewer days since last visit                          |
| Self-inflicted laceration in last 5 yrs                      | Mental health ER visit in last 3 mos.             | Depression diagnosis in last 5 yrs.                          |                                                      |
| Antidepressant Rx. in last 3 mos.                            | Other psychosis diagnosis in last year            | PHQ-9 Item 9 score = 2 with Age                              |                                                      |
| Eating Disorder diagnosis in last 5 yrs.                     | PHQ-9 Item 9 score =1 in last year                | Schizophrenia diagnosis in last 5 yrs.                       |                                                      |

The table below compares C-statistics for 30- and 90-day outcome windows for each of the four models. Model performance was essentially identical using the 30-day outcome window except for prediction of suicide death following a primary care visit. In that case, accuracy prediction was modestly less accurate, likely reflecting the much smaller number of events (suicide deaths within 30 days of primary care visit).

|                                              | 30-day outcome window | 90-day outcome window |
|----------------------------------------------|-----------------------|-----------------------|
| Suicide Attempt following MH Specialty Visit | 0.86                  | 0.85                  |
| Suicide Death following MH Specialty Visit   | 0.85                  | 0.86                  |
| Suicide Attempt following Primary Care Visit | 0.86                  | 0.85                  |
| Suicide Death following Primary Care Visit   | 0.80                  | 0.83                  |

**APPENDIX 8 – MODEL PERFORMANCE IN STRATA OF VALIDATION SAMPLE**

Sensitivity analyses examined model performance across strata of the validation sample defined by study site, sex, and age. As shown below, model performance was similar across all strata.

|                        | C-statistic for prediction of suicide attempt following MH specialty visit | C-statistic for prediction of suicide attempt following primary care visit |
|------------------------|----------------------------------------------------------------------------|----------------------------------------------------------------------------|
| <b>Study Sites</b>     |                                                                            |                                                                            |
| HealthPartners         | 0.85                                                                       | 0.84                                                                       |
| Henry Ford             | 0.82                                                                       | 0.82                                                                       |
| KP Colorado            | 0.84                                                                       | 0.83                                                                       |
| KP Hawaii              | 0.84                                                                       | 0.85                                                                       |
| KP Northwest           | 0.87                                                                       | 0.84                                                                       |
| KP Southern California | 0.85                                                                       | 0.86                                                                       |
| KP Washington          | 0.84                                                                       | 0.83                                                                       |
| <b>Sex</b>             |                                                                            |                                                                            |
| Male                   | 0.85                                                                       | 0.85                                                                       |
| Female                 | 0.85                                                                       | 0.85                                                                       |
| <b>Age</b>             |                                                                            |                                                                            |
| 13-17                  | 0.83                                                                       | 0.83                                                                       |
| 18 and older           | 0.86                                                                       | 0.86                                                                       |

**APPENDIX 9A – CANDIDATE PREDICTORS AND INTERACTION TERMS INCLUDED IN VARIABLE SELECTION MODELS (DETAILED SPECIFICATIONS FOR EACH PREDICTOR ARE AVAILABLE AT [WWW.GITHUB.COM/MHRESEARCHNETWORK](http://WWW.GITHUB.COM/MHRESEARCHNETWORK)).**

| Variable                    | Description                                               |
|-----------------------------|-----------------------------------------------------------|
| Age                         | Age in years                                              |
| ac1                         | Age 13-17                                                 |
| ac2                         | Age 18-29                                                 |
| ac3                         | Age 30-44                                                 |
| ac4                         | Age 45-64                                                 |
| ac5                         | Age 65+                                                   |
| ac1f                        | Age 13-17 * (gender=F)                                    |
| ac3f                        | Age 30-44 * (gender=F)                                    |
| ac4f                        | Age 45-64 * (gender=F)                                    |
| ac5f                        | Age 65+ * (gender=F)                                      |
| Not Enrolled                | VDW indicates individual is not enrolled on date of visit |
| Medicaid                    | Insurance Type, Exclusive categories                      |
| commercial                  | Insurance Type, Exclusive categories                      |
| Privatepay                  | Insurance Type, Exclusive categories                      |
| statesubsidized             | Insurance Type, Exclusive categories                      |
| Selffunded                  | Insurance Type, Exclusive categories                      |
| Medicare                    | Insurance Type, Exclusive categories                      |
| highdeductible              | Insurance Type, Exclusive categories                      |
| Other                       | Insurance Type, Exclusive categories                      |
| first_visit                 | 1/0. First recorded visit for individual                  |
| days_since_prev             | Days since previous visit.                                |
| Female                      | Gender=F                                                  |
| dep_dx_pre5y_noi_cumulative | Depression DX, (0,5] years prior                          |
| dep_dx_pre5y                | Depression DX, [1,5] years prior                          |
| anx_dx_pre5y_noi_cumulative | Anxiety DX, (0,5] years prior                             |
| anx_dx_pre5y                | Anxiety DX, [1,5] years prior                             |
| bip_dx_pre5y_noi_cumulative | Bipolar DX, (0,5] years prior                             |
| bip_dx_pre5y                | Bipolar DX, [1,5] years prior                             |
| sch_dx_pre5y_noi_cumulative | Schizophrenia DX, (0,5] years prior                       |
| sch_dx_pre5y                | Schizophrenia DX, [1,5] years prior                       |
| oth_dx_pre5y_noi_cumulative | Other Psychosis DX, (0,5] years prior                     |
| oth_dx_pre5y                | Other psychosis DX, [1,5] years prior                     |
| dem_dx_pre5y_noi_cumulative | Dementia DX, (0,5] years prior                            |
| dem_dx_pre5y                | Dementia DX, [1,5] years prior                            |
| add_dx_pre5y_noi_cumulative | ADD DX, (0,5] years prior                                 |
| add_dx_pre5y                | ADD DX, [1,5] years prior                                 |
| asd_dx_pre5y_noi_cumulative | ASD DX, (0,5] years prior                                 |

|                              |                                            |
|------------------------------|--------------------------------------------|
| asd_dx_pre5y                 | ASD DX, [1,5] years prior                  |
| per_dx_pre5y_noi_cumulative  | Personality disorder DX, (0,5] years prior |
| per_dx_pre5y                 | Personality disorder DX, [1,5] years prior |
| alc_dx_pre5y_noi_cumulative  | Alcohol use disorder DX, (0,5] years prior |
| alc_dx_pre5y                 | Alcohol use disorder DX, [1,5] years prior |
| pts_dx_pre5y_noi_cumulative  | PTSD DX, (0,5] years prior                 |
| pts_dx_pre5y                 | PTSD DX, [1,5] years prior                 |
| eat_dx_pre5y_noi_cumulative  | Eating disorder DX, (0,5] years prior      |
| eat_dx_pre5y                 | Eating disorder DX, [1,5] years prior      |
| tbi_dx_pre5y_noi_cumulative  | TBI DX, (0,5] years prior                  |
| tbi_dx_pre5y                 | TBI DX, [1,5] years prior                  |
| dru_dx_pre5y_noi_cumulative  | Drug use disorder DX, (0,5] years prior    |
| dru_dx_pre5y                 | Drug use disorder DX, [1,5] years prior    |
| antidep_rx_pre3m             | Antidepressant rx (0,3] months             |
| antidep_rx_pre1y_cumulative  | Antidepressant rx (0, 1] year              |
| antidep_rx_pre5y_cumulative  | Antidepressant rx (0, 5] years             |
| benzo_rx_pre3m               | Benzo rx (0,3] months                      |
| benzo_rx_pre1y_cumulative    | Benzo rx (0, 1] year                       |
| benzo_rx_pre5y_cumulative    | Benzo rx (0, 5] years                      |
| hypno_rx_pre3m               | Hypnotic rx (0,3] months                   |
| hypno_rx_pre1y_cumulative    | Hypnotic rx (0, 1] year                    |
| hypno_rx_pre5y_cumulative    | Hypnotic rx (0, 5] years                   |
| sga_rx_pre3m                 | SGA rx (0,3] months                        |
| sga_rx_pre1y_cumulative      | SGA rx (0, 1] year                         |
| sga_rx_pre5y_cumulative      | SGA rx (0, 5] years                        |
| mh_ip_pre3m                  | MH Inpatient stay (0, 3] months            |
| mh_ip_pre1y_cumulative       | MH Inpatient stay (0, 1] year              |
| mh_ip_pre5y_cumulative       | MH Inpatient stay (0, 5] years             |
| mh_op_pre3m                  | MH outpatient utilization (0, 3] months    |
| mh_op_pre1y_cumulative       | MH outpatient utilization (0, 1] year      |
| mh_op_pre5y_cumulative       | MH outpatient utilization (0, 5] years     |
| mh_ed_pre3m                  | MH ED utilization (0, 3] months            |
| mh_ed_pre1y_cumulative       | MH ED utilization (0, 1] year              |
| mh_ed_pre5y_cumulative       | MH ED utilization (0, 5] years             |
| any_sui_att_pre3m            | Prior suicide attempt (0, 3] months        |
| any_sui_att_pre1y_cumulative | Prior suicide attempt (0, 1] year          |
| any_sui_att_pre5y_cumulative | Prior suicide attempt (0, 5] years         |
| lvi_sui_att_pre3m            | LVI suicide attempt (0, 3] months          |
| lvi_sui_att_pre1y_cumulative | LVI suicide attempt (0, 1] year            |
| lvi_sui_att_pre5y_cumulative | LVI suicide attempt (0, 5] years           |
| ovi_sui_att_pre3m            | OVI suicide attempt (0, 3] months          |

|                                |                                                                                     |
|--------------------------------|-------------------------------------------------------------------------------------|
| ovi_sui_att_pre1y_cumulative   | OVI suicide attempt (0, 1] year                                                     |
| ovi_sui_att_pre5y_cumulative   | OVI suicide attempt (0, 5] years                                                    |
| any_inj_poi_pre3m              | Inj/Poi suicide attempt (0, 3] months                                               |
| any_inj_poi_pre1y_cumulative   | Inj/Poi suicide attempt (0, 1] year                                                 |
| any_inj_poi_pre5y_cumulative   | Inj/Poi suicide attempt (0, 5] years                                                |
| current_pregnancy              | Delivery 180 days after index visit or earlier                                      |
| del_pre_1_90                   | Delivery in prior [1, 90] days of index visit                                       |
| del_pre_1_180                  | Delivery in prior [1, 180] days of index visit                                      |
| del_pre_1_365                  | Delivery in prior [1, 365] days of index visit                                      |
| any_sui_att_pre5y_cumulative_f | Prior suicide attempt (0, 5] years * (gender=F)                                     |
| any_sui_att_pre5y_cumulative_a | Prior suicide attempt (0, 5] years * (age)                                          |
| charlson_score                 | Charlson score on index date                                                        |
| charlson_a                     | Charlson score on index date * (age)                                                |
| charlson_mi                    | Individual Charlson indicators                                                      |
| charlson_chd                   | Individual Charlson indicators                                                      |
| charlson_pvd                   | Individual Charlson indicators                                                      |
| charlson_cvd                   | Individual Charlson indicators                                                      |
| charlson_dem                   | Individual Charlson indicators                                                      |
| charlson_cpd                   | Individual Charlson indicators                                                      |
| charlson_rhd                   | Individual Charlson indicators                                                      |
| charlson_pud                   | Individual Charlson indicators                                                      |
| charlson_mlivd                 | Individual Charlson indicators                                                      |
| charlson_diab                  | Individual Charlson indicators                                                      |
| charlson_diabc                 | Individual Charlson indicators                                                      |
| charlson_plegia                | Individual Charlson indicators                                                      |
| charlson_ren                   | Individual Charlson indicators                                                      |
| charlson_malign                | Individual Charlson indicators                                                      |
| charlson_slivd                 | Individual Charlson indicators                                                      |
| charlson_mst                   | Individual Charlson indicators                                                      |
| charlson_aids                  | Individual Charlson indicators                                                      |
| raceAsian_asa                  | VDW Race1 = Asian * (Prior suicide attempt (0, 5] years)                            |
| raceBlack_asa                  | VDW Race1 = Black * (Prior suicide attempt (0, 5] years)                            |
| raceHP_asa                     | VDW Race1 = HI/PI * (Prior suicide attempt (0, 5] years)                            |
| raceIN_asa                     | VDW Race1 = Native American / Alaskan Native * (Prior suicide attempt (0, 5] years) |
| raceMUOT_asa                   | VDW Race1 = Multiple/Other * (Prior suicide attempt (0, 5] years)                   |
| raceUN_asa                     | VDW Race1 = Unknown * (Prior suicide attempt (0, 5] years)                          |
| hispanic_asa                   | VDW Hispanic = Yes * (Prior suicide attempt (0, 5] years)                           |
| raceAsian                      | VDW Race1 = Asian                                                                   |
| raceBlack                      | VDW Race1 = Black                                                                   |
| raceHP                         | VDW Race1 = HI/PI                                                                   |
| raceIN                         | VDW Race1 = Native American / Alaskan Native                                        |

|                |                                                           |
|----------------|-----------------------------------------------------------|
| raceMUOT       | VDW Race1 = Multiple/Other                                |
| raceUN         | VDW Race1 = Unknown                                       |
| raceWH         | VDW Race1 = White                                         |
| Hispanic       | VDW Hispanic = Yes                                        |
| raceAsian_f    | VDW Race1 = Asian * (Gender=F)                            |
| raceBlack_f    | VDW Race1 = Black * (Gender=F)                            |
| raceHP_f       | VDW Race1 = HI/PI * (Gender=F)                            |
| raceIN_f       | VDW Race1 = Native American / Alaskan Native * (Gender=F) |
| raceMUOT_f     | VDW Race1 = Multiple/Other * (Gender=F)                   |
| raceUN_f       | VDW Race1 = Unknown * (Gender=F)                          |
| hispanic_f     | VDW Hispanic = Yes * (Gender=F)                           |
| census_missing | Census variables observed (0/1)                           |
| hhld_inc_lt40k | Neighborhood income 40 (<\$40k/>=\$40k)                   |
| coll_deg_lt25p | Neighborhood education (<25% coll grad/>=25% coll grad)   |
| phqNumber90    | Total # of PHQs in prior 90 days                          |
| phqMode90_0    | Modal PHQ9 value in prior 90 days = 0                     |
| phqMode90_1    | Modal PHQ9 value in prior 90 days = 1                     |
| phqMode90_2    | Modal PHQ9 value in prior 90 days = 2                     |
| phqMax90_0     | Maximum PHQ9 value in prior 90 days =0                    |
| phqMax90_1     | Maximum PHQ9 value in prior 90 days =1                    |
| phqMax90_2     | Maximum PHQ9 value in prior 90 days =2                    |
| phqMax90_3     | Maximum PHQ9 value in prior 90 days =3                    |
| phqNumber183   | Total # of PHQs in prior 183 days                         |
| phqMode183_0   | Modal PHQ9 value in prior 183 days = 0                    |
| phqMode183_1   | Modal PHQ9 value in prior 183 days = 1                    |
| phqMode183_2   | Modal PHQ9 value in prior 183 days = 2                    |
| phqMax183_0    | Maximum PHQ9 value in prior 183 days =0                   |
| phqMax183_1    | Maximum PHQ9 value in prior 183 days =1                   |
| phqMax183_2    | Maximum PHQ9 value in prior 183 days =2                   |
| phqMax183_3    | Maximum PHQ9 value in prior 183 days =3                   |
| phqNumber365   | Total # of PHQs in prior 365 days                         |
| phqMode365_0   | Modal PHQ9 value in prior 365 days = 0                    |
| phqMode365_1   | Modal PHQ9 value in prior 365 days = 1                    |
| phqMode365_2   | Modal PHQ9 value in prior 365 days = 2                    |
| phqMax365_0    | Maximum PHQ9 value in prior 365 days =0                   |
| phqMax365_1    | Maximum PHQ9 value in prior 365 days =1                   |
| phqMax365_2    | Maximum PHQ9 value in prior 365 days =2                   |
| phqMax365_3    | Maximum PHQ9 value in prior 365 days =3                   |
| raceAsian_de   | VDW Race1 = Asian * (Depression DX, [0,5] years prior)    |
| raceBlack_de   | VDW Race1 = Black * (Depression DX, [0,5] years prior)    |
| raceHP_de      | VDW Race1 = HI/PI * (Depression DX, [0,5] years prior)    |



|                           |                                                                                      |
|---------------------------|--------------------------------------------------------------------------------------|
| raceIN_de                 | VDW Race1 = Native American / Alaskan Native * (Depression DX, [0,5] years prior)    |
| raceMUOT_de               | VDW Race1 = Multiple/Other * (Depression DX, [0,5] years prior)                      |
| raceUN_de                 | VDW Race1 = Unknown * (Depression DX, [0,5] years prior)                             |
| hispanic_de               | VDW Hispanic = Yes * (Depression DX, [0,5] years prior)                              |
| raceAsian_an              | VDW Race1 = Asian * (Anxiety DX, [0,5] years prior)                                  |
| raceBlack_an              | VDW Race1 = Black * (Anxiety DX, [0,5] years prior)                                  |
| raceHP_an                 | VDW Race1 = HI/PI * (Anxiety DX, [0,5] years prior)                                  |
| raceIN_an                 | VDW Race1 = Native American / Alaskan Native * (Anxiety DX, [0,5] years prior)       |
| raceMUOT_an               | VDW Race1 = Multiple/Other * (Anxiety DX, [0,5] years prior)                         |
| raceUN_an                 | VDW Race1 = Unknown * (Anxiety DX, [0,5] years prior)                                |
| hispanic_an               | VDW Hispanic = Yes * (Anxiety DX, [0,5] years prior)                                 |
| raceAsian_bi              | VDW Race1 = Asian * (Bipolar DX, [0,5] years prior)                                  |
| raceBlack_bi              | VDW Race1 = Black * (Bipolar DX, [0,5] years prior)                                  |
| raceHP_bi                 | VDW Race1 = HI/PI * (Bipolar DX, [0,5] years prior)                                  |
| raceIN_bi                 | VDW Race1 = Native American / Alaskan Native * (Bipolar DX, [0,5] years prior)       |
| raceMUOT_bi               | VDW Race1 = Multiple/Other * (Bipolar DX, [0,5] years prior)                         |
| raceUN_bi                 | VDW Race1 = Unknown * (Bipolar DX, [0,5] years prior)                                |
| hispanic_bi               | VDW Hispanic = Yes * (Bipolar DX, [0,5] years prior)                                 |
| raceAsian_sc              | VDW Race1 = Asian * (Schizophrenia DX, [0,5] years prior)                            |
| raceBlack_sc              | VDW Race1 = Black * (Schizophrenia DX, [0,5] years prior)                            |
| raceHP_sc                 | VDW Race1 = HI/PI * (Schizophrenia DX, [0,5] years prior)                            |
| raceIN_sc                 | VDW Race1 = Native American / Alaskan Native * (Schizophrenia DX, [0,5] years prior) |
| raceMUOT_sc               | VDW Race1 = Multiple/Other * (Schizophrenia DX, [0,5] years prior)                   |
| raceUN_sc                 | VDW Race1 = Unknown * (Schizophrenia DX, [0,5] years prior)                          |
| hispanic_sc               | VDW Hispanic = Yes * (Schizophrenia DX, [0,5] years prior)                           |
| dep_dx_pre5y_cumulative   | Depression DX, [0,5] years prior                                                     |
| dep_dx_pre5y_cumulative_f | Depression DX, [0,5] years prior * (gender=F)                                        |
| dep_dx_pre5y_cumulative_a | Depression DX, [0,5] years prior * (age)                                             |
| anx_dx_pre5y_cumulative   | Anxiety DX, [0,5] years prior                                                        |
| anx_dx_pre5y_cumulative_f | Anxiety DX, [0,5] years prior * (gender=F)                                           |
| anx_dx_pre5y_cumulative_a | Anxiety DX, [0,5] years prior * (age)                                                |
| bip_dx_pre5y_cumulative   | Bipolar DX, [0,5] years prior                                                        |
| bip_dx_pre5y_cumulative_f | Bipolar DX, [0,5] years prior * (gender=F)                                           |
| bip_dx_pre5y_cumulative_a | Bipolar DX, [0,5] years prior * (age)                                                |
| sch_dx_pre5y_cumulative   | Schizophrenia DX, [0,5] years prior                                                  |
| sch_dx_pre5y_cumulative_f | Schizophrenia DX, [0,5] years prior * (gender=F)                                     |
| sch_dx_pre5y_cumulative_a | Schizophrenia DX, [0,5] years prior * (age)                                          |
| oth_dx_pre5y_cumulative   | Other Psychosis DX, [0,5] years prior                                                |
| dem_dx_pre5y_cumulative   | Dementia DX, [0,5] years prior                                                       |

|                         |                                                                   |
|-------------------------|-------------------------------------------------------------------|
| add_dx_pre5y_cumulative | ADD DX, [0,5] years prior                                         |
| asd_dx_pre5y_cumulative | ASD DX, [0,5] years prior                                         |
| per_dx_pre5y_cumulative | Personality disorder DX, [0,5] years prior                        |
| alc_dx_pre5y_cumulative | Alcohol use disorder DX, [0,5] years prior                        |
| dru_dx_pre5y_cumulative | Drug use disorder DX, [0,5] years prior                           |
| pts_dx_pre5y_cumulative | PTSD DX, [0,5] years prior                                        |
| eat_dx_pre5y_cumulative | Eating disorder DX, [0,5] years prior                             |
| tbi_dx_pre5y_cumulative | TBI DX, [0,5] years prior                                         |
| phq8_index_score_calc   | PHQ8 total score                                                  |
| phq8_missing            | PHQ8 missing at visit (1 if missing)                              |
| phq8_index_score_calc_f | PHQ8 total score * (gender=F)                                     |
| phq8_missing_f          | PHQ8 missing at visit (1 if missing) * (gender=F)                 |
| raceAsian_8             | VDW Race1 = Asian * (PHQ8 total score)                            |
| raceBlack_8             | VDW Race1 = Black * (PHQ8 total score)                            |
| raceHP_8                | VDW Race1 = HI/PI * (PHQ8 total score)                            |
| raceIN_8                | VDW Race1 = Native American / Alaskan Native * (PHQ8 total score) |
| raceMUOT_8              | VDW Race1 = Multiple/Other * (PHQ8 total score)                   |
| raceUN_8                | VDW Race1 = Unknown * (PHQ8 total score)                          |
| hispanic_8              | VDW Hispanic = Yes * (PHQ8 total score)                           |
| age_8                   | Age * (PHQ8 total score)                                          |
| q9_0                    | PHQ9 = 0 at index visit                                           |
| q9_1                    | PHQ9 = 1 at index visit                                           |
| q9_2                    | PHQ9 = 2 at index visit                                           |
| q9_3                    | PHQ9 = 3 at index visit                                           |
| q9_0_f                  | PHQ9 = 0 * (gender=F)                                             |
| q9_1_f                  | PHQ9 = 1 * (gender=F)                                             |
| q9_2_f                  | PHQ9 = 2 * (gender=F)                                             |
| q9_3_f                  | PHQ9 = 3 * (gender=F)                                             |
| q9_0_a                  | PHQ9 = 0 * (age)                                                  |
| q9_1_a                  | PHQ9 = 1 * (age)                                                  |
| q9_2_a                  | PHQ9 = 2 * (age)                                                  |
| q9_3_a                  | PHQ9 = 3 * (age)                                                  |
| raceAsian_q90           | VDW Race1 = Asian * (PHQ9=0)                                      |
| raceBlack_q90           | VDW Race1 = Black * (PHQ9=0)                                      |
| raceHP_q90              | VDW Race1 = HI/PI * (PHQ9=0)                                      |
| raceIN_q90              | VDW Race1 = Native American / Alaskan Native * (PHQ9=0)           |
| raceMUOT_q90            | VDW Race1 = Multiple/Other * (PHQ9=0)                             |
| raceUN_q90              | VDW Race1 = Unknown * (PHQ9=0)                                    |
| hispanic_q90            | VDW Hispanic = Yes * (PHQ9=0)                                     |
| raceAsian_q91           | VDW Race1 = Asian * (PHQ9=1)                                      |
| raceBlack_q91           | VDW Race1 = Black * (PHQ9=1)                                      |

|               |                                                         |
|---------------|---------------------------------------------------------|
| raceHP_q91    | VDW Race1 = HI/PI * (PHQ9=1)                            |
| raceIN_q91    | VDW Race1 = Native American / Alaskan Native * (PHQ9=1) |
| raceMUOT_q91  | VDW Race1 = Multiple/Other * (PHQ9=1)                   |
| raceUN_q91    | VDW Race1 = Unknown * (PHQ9=1)                          |
| hispanic_q91  | VDW Hispanic = Yes * (PHQ9=1)                           |
| raceAsian_q92 | VDW Race1 = Asian * (PHQ9=2)                            |
| raceBlack_q92 | VDW Race1 = Black * (PHQ9=2)                            |
| raceHP_q92    | VDW Race1 = HI/PI * (PHQ9=2)                            |
| raceIN_q92    | VDW Race1 = Native American / Alaskan Native * (PHQ9=2) |
| raceMUOT_q92  | VDW Race1 = Multiple/Other * (PHQ9=2)                   |
| raceUN_q92    | VDW Race1 = Unknown * (PHQ9=2)                          |
| hispanic_q92  | VDW Hispanic = Yes * (PHQ9=2)                           |
| raceAsian_q93 | VDW Race1 = Asian * (PHQ9=3)                            |
| raceBlack_q93 | VDW Race1 = Black * (PHQ9=3)                            |
| raceHP_q93    | VDW Race1 = HI/PI * (PHQ9=3)                            |
| raceIN_q93    | VDW Race1 = Native American / Alaskan Native * (PHQ9=3) |
| raceMUOT_q93  | VDW Race1 = Multiple/Other * (PHQ9=3)                   |
| raceUN_q93    | VDW Race1 = Unknown * (PHQ9=3)                          |
| hispanic_q93  | VDW Hispanic = Yes * (PHQ9=3)                           |
| q9_0_8        | PHQ9 = 0 * (PHQ8 total score)                           |
| q9_1_8        | PHQ9 = 1 * (PHQ8 total score)                           |
| q9_2_8        | PHQ9 = 2 * (PHQ8 total score)                           |
| q9_3_8        | PHQ9 = 3 * (PHQ8 total score)                           |
| q9_0_c        | PHQ9 = 0 * (Charlson score)                             |
| q9_1_c        | PHQ9 = 1 * (Charlson score)                             |
| q9_2_c        | PHQ9 = 2 * (Charlson score)                             |
| q9_3_c        | PHQ9 = 3 * (Charlson score)                             |
| q9_0_de       | PHQ9 = 0 * (Depression DX, [0,5] years prior)           |
| q9_1_de       | PHQ9 = 1 * (Depression DX, [0,5] years prior)           |
| q9_2_de       | PHQ9 = 2 * (Depression DX, [0,5] years prior)           |
| q9_3_de       | PHQ9 = 3 * (Depression DX, [0,5] years prior)           |
| q9_0_an       | PHQ9 = 0 * (Anxiety DX, [0,5] years prior)              |
| q9_1_an       | PHQ9 = 1 * (Anxiety DX, [0,5] years prior)              |
| q9_2_an       | PHQ9 = 2 * (Anxiety DX, [0,5] years prior)              |
| q9_3_an       | PHQ9 = 3 * (Anxiety DX, [0,5] years prior)              |
| q9_0_bi       | PHQ9 = 0 * (Bipolar DX, [0,5] years prior)              |
| q9_1_bi       | PHQ9 = 1 * (Bipolar DX, [0,5] years prior)              |
| q9_2_bi       | PHQ9 = 2 * (Bipolar DX, [0,5] years prior)              |
| q9_3_bi       | PHQ9 = 3 * (Bipolar DX, [0,5] years prior)              |
| q9_0_sc       | PHQ9 = 0 * (Schizophrenia DX, [0,5] years prior)        |
| q9_1_sc       | PHQ9 = 1 * (Schizophrenia DX, [0,5] years prior)        |

|                                     |                                                                               |
|-------------------------------------|-------------------------------------------------------------------------------|
| q9_2_sc                             | PHQ9 = 2 * (Schizophrenia DX, [0,5] years prior)                              |
| q9_3_sc                             | PHQ9 = 3 * (Schizophrenia DX, [0,5] years prior)                              |
| q9_0_al                             | PHQ9 = 0 * (age)                                                              |
| q9_1_al                             | PHQ9 = 1 * (age)                                                              |
| q9_2_al                             | PHQ9 = 2 * (age)                                                              |
| q9_3_al                             | PHQ9 = 3 * (age)                                                              |
| q9_0_dr                             | PHQ9 = 0 * (age)                                                              |
| q9_1_dr                             | PHQ9 = 1 * (age)                                                              |
| q9_2_dr                             | PHQ9 = 2 * (age)                                                              |
| q9_3_dr                             | PHQ9 = 3 * (age)                                                              |
| q9_0_pe                             | PHQ9 = 0 * (age)                                                              |
| q9_1_pe                             | PHQ9 = 1 * (age)                                                              |
| q9_2_pe                             | PHQ9 = 2 * (age)                                                              |
| q9_3_pe                             | PHQ9 = 3 * (age)                                                              |
| any_sui_att_pre5y_cumulative_8      | Prior suicide attempt (0, 5] years * (PHQ8 total score)                       |
| any_sui_att_pre5y_cumulative_c      | Prior suicide attempt (0, 5] years * (Charlson score)                         |
| any_sui_att_pre5y_cumulative_d<br>e | Prior suicide attempt (0, 5] years * (Depression DX, [0,5] years prior)       |
| any_sui_att_pre5y_cumulative_a<br>n | Prior suicide attempt (0, 5] years * (Anxiety DX, [0,5] years prior)          |
| any_sui_att_pre5y_cumulative_b<br>i | Prior suicide attempt (0, 5] years * (Bipolar DX, [0,5] years prior)          |
| any_sui_att_pre5y_cumulative_s<br>c | Prior suicide attempt (0, 5] years * (Schizophrenia DX, [0,5] years prior)    |
| any_sui_att_pre5y_cumulative_a<br>l | Prior suicide attempt (0, 5] years * (Alcohol use disorder [0,5] years prior) |
| any_sui_att_pre5y_cumulative_d<br>r | Prior suicide attempt (0, 5] years * (Drug use disorder [0,5] years prior)    |
| any_sui_att_pre5y_cumulative_p<br>e | Prior suicide attempt (0, 5] years * (Personality disorder [0,5] years prior) |
| phqMax90_0_q90                      | Maximum PHQ9 value in prior 90 days =0 * (PHQ9 index = 0)                     |
| phqMax90_1_q90                      | Maximum PHQ9 value in prior 90 days =1 * (PHQ9 index = 0)                     |
| phqMax90_2_q90                      | Maximum PHQ9 value in prior 90 days =2 * (PHQ9 index = 0)                     |
| phqMax90_3_q90                      | Maximum PHQ9 value in prior 90 days =3 * (PHQ9 index = 0)                     |
| phqMax90_0_q91                      | Maximum PHQ9 value in prior 90 days =0 * (PHQ9 index = 1)                     |
| phqMax90_1_q91                      | Maximum PHQ9 value in prior 90 days =1 * (PHQ9 index = 1)                     |
| phqMax90_2_q91                      | Maximum PHQ9 value in prior 90 days =2 * (PHQ9 index = 1)                     |
| phqMax90_3_q91                      | Maximum PHQ9 value in prior 90 days =3 * (PHQ9 index = 1)                     |
| phqMax90_0_q92                      | Maximum PHQ9 value in prior 90 days =0 * (PHQ9 index = 2)                     |
| phqMax90_1_q92                      | Maximum PHQ9 value in prior 90 days =1 * (PHQ9 index = 2)                     |
| phqMax90_2_q92                      | Maximum PHQ9 value in prior 90 days =2 * (PHQ9 index = 2)                     |
| phqMax90_3_q92                      | Maximum PHQ9 value in prior 90 days =3 * (PHQ9 index = 2)                     |
| phqMax90_0_q93                      | Maximum PHQ9 value in prior 90 days =0 * (PHQ9 index = 3)                     |
| phqMax90_1_q93                      | Maximum PHQ9 value in prior 90 days =1 * (PHQ9 index = 3)                     |
| phqMax90_2_q93                      | Maximum PHQ9 value in prior 90 days =2 * (PHQ9 index = 3)                     |

phqMax90\_3\_q93

Maximum PHQ9 value in prior 90 days =3 \* (PHQ9 index = 3)

APPENDIX 9B – COEFFICIENTS FOR PREDICTION OF SUICIDE ATTEMPT IN 90 DAYS FOLLOWING MENTAL HEALTH SPECIALTY VISIT.

|                             | Coefficient | Std. Err. | Z score | p value | Lower 95%<br>Conf Limit | Upper 95%<br>Conf Limit |
|-----------------------------|-------------|-----------|---------|---------|-------------------------|-------------------------|
| Constant                    | -5.497382   | 0.1526108 | -36.02  | 0.0000  | -5.796494               | -5.19827                |
| Age                         | -0.034902   | 0.0052251 | -6.68   | 0.0000  | -0.045143               | -0.0246611              |
| ac1                         | 0.178448    | 0.0765344 | 2.33    | 0.0200  | 0.0284434               | 0.3284526               |
| ac3                         | -0.0358015  | 0.0779359 | -0.46   | 0.6460  | -0.1885529              | 0.11695                 |
| ac4                         | -0.0197698  | 0.1428961 | -0.14   | 0.8900  | -0.299841               | 0.2603014               |
| ac5                         | 0.3466038   | 0.226428  | 1.53    | 0.1260  | -0.0971869              | 0.7903945               |
| ac1f                        | 0.5063412   | 0.0709917 | 7.13    | 0.0000  | 0.3672                  | 0.6454823               |
| Commercial                  | -0.0128649  | 0.0533821 | -0.24   | 0.8100  | -0.1174919              | 0.0917622               |
| Privatepay                  | 0.0561249   | 0.067065  | 0.84    | 0.4030  | -0.0753201              | 0.1875699               |
| Medicare                    | 0.0171635   | 0.0786832 | 0.22    | 0.8270  | -0.1370527              | 0.1713797               |
| days_since_prev             | -0.0002604  | 0.000094  | -2.77   | 0.0060  | -0.0004446              | -0.0000761              |
| dep_dx_pre5y                | -0.1706591  | 0.0407284 | -4.19   | 0.0000  | -0.2504852              | -0.090833               |
| anx_dx_pre5y                | -0.198161   | 0.0453207 | -4.37   | 0.0000  | -0.2869878              | -0.1093341              |
| dru_dx_pre5y                | -0.0584846  | 0.059373  | -0.99   | 0.3250  | -0.1748536              | 0.0578843               |
| antidep_rx_pre3m            | 0.1840148   | 0.0490479 | 3.75    | 0.0000  | 0.0878826               | 0.280147                |
| antidep_rx_pre1y_cumulative | 0.1500438   | 0.0816689 | 1.84    | 0.0660  | -0.0100243              | 0.3101119               |
| antidep_rx_pre5y_cumulative | 0.1732092   | 0.0786609 | 2.2     | 0.0280  | 0.0190367               | 0.3273817               |
| benzo_rx_pre3m              | 0.3239251   | 0.0553329 | 5.85    | 0.0000  | 0.2154746               | 0.4323756               |
| benzo_rx_pre1y_cumulative   | 0.1700364   | 0.0696374 | 2.44    | 0.0150  | 0.0335495               | 0.3065232               |
| benzo_rx_pre5y_cumulative   | -0.1660521  | 0.0669744 | -2.48   | 0.0130  | -0.2973196              | -0.0347846              |
| hypno_rx_pre3m              | 0.1012587   | 0.0894787 | 1.13    | 0.2580  | -0.0741163              | 0.2766336               |
| hypno_rx_pre1y_cumulative   | 0.0108364   | 0.0931915 | 0.12    | 0.9070  | -0.1718156              | 0.1934884               |
| hypno_rx_pre5y_cumulative   | 0.1058904   | 0.0679549 | 1.56    | 0.1190  | -0.0272988              | 0.2390797               |
| sga_rx_pre3m                | 0.0223592   | 0.0585382 | 0.38    | 0.7020  | -0.0923735              | 0.1370919               |
| sga_rx_pre1y_cumulative     | 0.1591924   | 0.0850285 | 1.87    | 0.0610  | -0.0074603              | 0.3258452               |
| sga_rx_pre5y_cumulative     | 0.1811564   | 0.0765831 | 2.37    | 0.0180  | 0.0310563               | 0.3312566               |
| mh_ip_pre3m                 | 0.125625    | 0.0635033 | 1.98    | 0.0480  | 0.0011608               | 0.2500893               |
| mh_ip_pre1y_cumulative      | 0.3349677   | 0.0652296 | 5.14    | 0.0000  | 0.20712                 | 0.4628153               |
| mh_ip_pre5y_cumulative      | 0.0636899   | 0.0632146 | 1.01    | 0.3140  | -0.0602084              | 0.1875881               |
| mh_op_pre1y_cumulative      | -0.2080869  | 0.0403627 | -5.16   | 0.0000  | -0.2871964              | -0.1289774              |
| mh_op_pre5y_cumulative      | -0.1074946  | 0.0506318 | -2.12   | 0.0340  | -0.2067311              | -0.0082582              |
| mh_ed_pre3m                 | 0.2510373   | 0.0545116 | 4.61    | 0.0000  | 0.1441965               | 0.3578781               |
| mh_ed_pre1y_cumulative      | 0.1537127   | 0.0637779 | 2.41    | 0.0160  | 0.0287104               | 0.278715                |
| mh_ed_pre5y_cumulative      | 0.166392    | 0.0605335 | 2.75    | 0.0060  | 0.0477486               | 0.2850354               |
| any_sui_att_pre3m           | 0.2960692   | 0.0829284 | 3.57    | 0.0000  | 0.1335325               | 0.4586059               |

|                                |            |           |       |        |            |            |
|--------------------------------|------------|-----------|-------|--------|------------|------------|
| any_sui_att_pre1y_cumulative   | 0.2702175  | 0.079422  | 3.4   | 0.0010 | 0.1145532  | 0.4258818  |
| lvi_sui_att_pre5y_cumulative   | 0.2485821  | 0.0712528 | 3.49  | 0.0000 | 0.1089292  | 0.388235   |
| any_inj_poi_pre3m              | 0.1847974  | 0.0523727 | 3.53  | 0.0000 | 0.0821488  | 0.2874459  |
| any_inj_poi_pre1y_cumulative   | 0.138099   | 0.0487646 | 2.83  | 0.0050 | 0.0425221  | 0.2336758  |
| any_inj_poi_pre5y_cumulative   | 0.0439858  | 0.0462546 | 0.95  | 0.3420 | -0.0466714 | 0.1346431  |
| any_sui_att_pre5y_cumulative_a | 0.0260373  | 0.002057  | 12.66 | 0.0000 | 0.0220056  | 0.0300691  |
| charlson_cpd                   | -0.0447908 | 0.0485725 | -0.92 | 0.3560 | -0.1399912 | 0.0504095  |
| Raceasian                      | -0.149802  | 0.0690079 | -2.17 | 0.0300 | -0.285055  | -0.014549  |
| Raceblack                      | -0.0482917 | 0.1710409 | -0.28 | 0.7780 | -0.3835256 | 0.2869422  |
| Raceun                         | -0.124487  | 0.0525685 | -2.37 | 0.0180 | -0.2275195 | -0.0214546 |
| census_missing                 | -0.1624266 | 0.0645285 | -2.52 | 0.0120 | -0.2889001 | -0.0359532 |
| coll_deg_lt25p                 | -0.0618083 | 0.0371018 | -1.67 | 0.0960 | -0.1345265 | 0.01091    |
| phqnumber90                    | -0.0002945 | 0.0143266 | -0.02 | 0.9840 | -0.0283741 | 0.0277852  |
| phqmode90_0                    | -0.0567475 | 0.0668494 | -0.85 | 0.3960 | -0.1877698 | 0.0742748  |
| phqmode90_1                    | 0.0355083  | 0.0809439 | 0.44  | 0.6610 | -0.1231389 | 0.1941555  |
| phqmode90_2                    | 0.1007399  | 0.1184649 | 0.85  | 0.3950 | -0.1314469 | 0.3329268  |
| phqmax90_2                     | 0.1138703  | 0.1116468 | 1.02  | 0.3080 | -0.1049535 | 0.332694   |
| phqnumber183                   | 0.0082783  | 0.0105519 | 0.78  | 0.4330 | -0.0124031 | 0.0289597  |
| phqmax183_1                    | 0.1329516  | 0.0767889 | 1.73  | 0.0830 | -0.0175519 | 0.283455   |
| phqmode365_2                   | 0.0542167  | 0.0901175 | 0.6   | 0.5470 | -0.1224102 | 0.2308437  |
| phqmax365_0                    | -0.1682208 | 0.068636  | -2.45 | 0.0140 | -0.3027449 | -0.0336966 |
| phqmax365_2                    | 0.0781856  | 0.0961671 | 0.81  | 0.4160 | -0.1102984 | 0.2666696  |
| phqmax365_3                    | 0.4336656  | 0.0772601 | 5.61  | 0.0000 | 0.2822386  | 0.5850926  |
| raceblack_de                   | -0.145304  | 0.1750764 | -0.83 | 0.4070 | -0.4884475 | 0.1978394  |
| hispanic_an                    | -0.0950878 | 0.0530674 | -1.79 | 0.0730 | -0.199098  | 0.0089223  |
| dep_dx_pre5y_cumulative        | 0.9937001  | 0.1064354 | 9.34  | 0.0000 | 0.7850907  | 1.20231    |
| dep_dx_pre5y_cumulative_f      | 0.0124627  | 0.0463009 | 0.27  | 0.7880 | -0.0782854 | 0.1032108  |
| dep_dx_pre5y_cumulative_a      | -0.0104171 | 0.0028933 | -3.6  | 0.0000 | -0.0160878 | -0.0047464 |
| anx_dx_pre5y_cumulative        | 0.079513   | 0.0743987 | 1.07  | 0.2850 | -0.0663058 | 0.2253317  |
| anx_dx_pre5y_cumulative_a      | 0.0047955  | 0.0021518 | 2.23  | 0.0260 | 0.000578   | 0.009013   |
| bip_dx_pre5y_cumulative_a      | 0.0065237  | 0.0012021 | 5.43  | 0.0000 | 0.0041676  | 0.0088798  |
| sch_dx_pre5y_cumulative_a      | 0.0007926  | 0.0019839 | 0.4   | 0.6900 | -0.0030957 | 0.0046809  |
| oth_dx_pre5y_cumulative        | 0.1572326  | 0.0543033 | 2.9   | 0.0040 | 0.0508     | 0.2636651  |
| dem_dx_pre5y_cumulative        | 0.1391769  | 0.0841825 | 1.65  | 0.0980 | -0.0258178 | 0.3041717  |
| add_dx_pre5y_cumulative        | -0.1002797 | 0.0501473 | -2    | 0.0460 | -0.1985665 | -0.0019929 |
| asd_dx_pre5y_cumulative        | -0.3909997 | 0.1241948 | -3.15 | 0.0020 | -0.634417  | -0.1475824 |
| per_dx_pre5y_cumulative        | 0.2835966  | 0.0494359 | 5.74  | 0.0000 | 0.186704   | 0.3804893  |
| alc_dx_pre5y_cumulative        | 0.3991401  | 0.0696063 | 5.73  | 0.0000 | 0.2627142  | 0.535566   |
| dru_dx_pre5y_cumulative        | 0.4591372  | 0.0550148 | 8.35  | 0.0000 | 0.3513102  | 0.5669642  |
| pts_dx_pre5y_cumulative        | 0.0623086  | 0.0489565 | 1.27  | 0.2030 | -0.0336445 | 0.1582616  |
| eat_dx_pre5y_cumulative        | 0.2768611  | 0.0651765 | 4.25  | 0.0000 | 0.1491176  | 0.4046046  |

|                                 |            |           |       |        |            |            |
|---------------------------------|------------|-----------|-------|--------|------------|------------|
| raceasian_8                     | 0.0128594  | 0.0096657 | 1.33  | 0.1830 | -0.0060851 | 0.0318038  |
| raceblack_8                     | -0.0062793 | 0.0092338 | -0.68 | 0.4960 | -0.0243773 | 0.0118186  |
| racehp_8                        | -0.0197291 | 0.0118142 | -1.67 | 0.0950 | -0.0428845 | 0.0034262  |
| racein_8                        | -0.0280699 | 0.0109976 | -2.55 | 0.0110 | -0.0496248 | -0.0065149 |
| q9_1_a                          | 0.0066678  | 0.0024458 | 2.73  | 0.0060 | 0.0018742  | 0.0114614  |
| q9_2_a                          | 0.0086971  | 0.0032327 | 2.69  | 0.0070 | 0.0023612  | 0.0150331  |
| q9_3_a                          | 0.0128     | 0.0034778 | 3.68  | 0.0000 | 0.0059835  | 0.0196165  |
| q9_1_8                          | 0.0109181  | 0.0055657 | 1.96  | 0.0500 | 9.49E-06   | 0.0218268  |
| q9_2_8                          | 0.0202854  | 0.0067916 | 2.99  | 0.0030 | 0.0069741  | 0.0335968  |
| q9_3_8                          | 0.0288333  | 0.0065327 | 4.41  | 0.0000 | 0.0160294  | 0.0416372  |
| q9_1_c                          | -0.0682734 | 0.0453817 | -1.5  | 0.1320 | -0.15722   | 0.0206731  |
| q9_2_c                          | -0.1170131 | 0.0481072 | -2.43 | 0.0150 | -0.2113015 | -0.0227247 |
| q9_3_c                          | -0.2917472 | 0.0719785 | -4.05 | 0.0000 | -0.4328225 | -0.1506719 |
| q9_0_de                         | -0.2325519 | 0.0457266 | -5.09 | 0.0000 | -0.3221744 | -0.1429294 |
| any_sui_att_pre5y_cumulative_8  | -0.0160737 | 0.0049339 | -3.26 | 0.0010 | -0.025744  | -0.0064034 |
| any_sui_att_pre5y_cumulative_c  | 0.0591954  | 0.0340745 | 1.74  | 0.0820 | -0.0075894 | 0.1259801  |
| any_sui_att_pre5y_cumulative_sc | 0.2117987  | 0.13707   | 1.55  | 0.1220 | -0.0568536 | 0.4804511  |
| any_sui_att_pre5y_cumulative_al | -0.146646  | 0.1079329 | -1.36 | 0.1740 | -0.3581906 | 0.0648986  |
| any_sui_att_pre5y_cumulative_dr | -0.3357564 | 0.0811408 | -4.14 | 0.0000 | -0.4947894 | -0.1767233 |



APPENDIX 9C – COEFFICIENTS FOR PREDICTION OF SUICIDE ATTEMPT IN 90 DAYS FOLLOWING PRIMARY CARE VISIT WITH MENTAL HEALTH DIAGNOSIS.

|                             | Coefficient | Std. Err. | Z score | p value | Lower 95%<br>Conf Limit | Upper 95%<br>Conf Limit |
|-----------------------------|-------------|-----------|---------|---------|-------------------------|-------------------------|
| Constant                    | -6.592665   | 0.1053113 | -62.6   | 0.0000  | -6.799071               | -6.386258               |
| Age                         | -0.0177708  | 0.0018079 | -9.83   | 0.0000  | -0.0213143              | -0.0142274              |
| ac1                         | 0.2800567   | 0.0805714 | 3.48    | 0.0010  | 0.1221396               | 0.4379738               |
| ac3                         | -0.1544488  | 0.0427262 | -3.61   | 0.0000  | -0.2381905              | -0.0707071              |
| ac4                         | -0.169057   | 0.0643787 | -2.63   | 0.0090  | -0.295237               | -0.042877               |
| ac1f                        | 0.7085663   | 0.0884772 | 8.01    | 0.0000  | 0.5351542               | 0.8819784               |
| ac4f                        | -0.01017    | 0.0727996 | -0.14   | 0.8890  | -0.1528546              | 0.1325147               |
| Medicaid                    | 0.2015132   | 0.0508559 | 3.96    | 0.0000  | 0.1018375               | 0.301189                |
| Commercial                  | -0.0605431  | 0.0399253 | -1.52   | 0.1290  | -0.1387954              | 0.0177091               |
| Selffunded                  | 0.2860064   | 0.0572091 | 5       | 0.0000  | 0.1738786               | 0.3981343               |
| highdeductible              | -0.1090385  | 0.0583723 | -1.87   | 0.0620  | -0.2234462              | 0.0053691               |
| days_since_prev             | -0.0003243  | 0.0000753 | -4.31   | 0.0000  | -0.0004719              | -0.0001767              |
| Female                      | -0.2056298  | 0.0481892 | -4.27   | 0.0000  | -0.3000788              | -0.1111807              |
| dep_dx_pre5y_noi_cumulative | -0.4051398  | 0.0543251 | -7.46   | 0.0000  | -0.511615               | -0.2986646              |
| dep_dx_pre5y                | -0.0878258  | 0.0447826 | -1.96   | 0.0500  | -0.1755981              | -0.0000534              |
| anx_dx_pre5y                | -0.2380795  | 0.0438714 | -5.43   | 0.0000  | -0.3240659              | -0.152093               |
| bip_dx_pre5y                | -0.1424411  | 0.0702716 | -2.03   | 0.0430  | -0.2801709              | -0.0047113              |
| add_dx_pre5y                | -0.1410835  | 0.0585855 | -2.41   | 0.0160  | -0.2559091              | -0.026258               |
| alc_dx_pre5y                | -0.1626887  | 0.0867405 | -1.88   | 0.0610  | -0.332697               | 0.0073196               |
| dru_dx_pre5y_noi_cumulative | -0.8148915  | 0.0774144 | -10.53  | 0.0000  | -0.9666209              | -0.6631621              |
| dru_dx_pre5y                | -0.0480855  | 0.0634033 | -0.76   | 0.4480  | -0.1723537              | 0.0761828               |
| antidep_rx_pre3m            | 0.1362236   | 0.0467613 | 2.91    | 0.0040  | 0.0445732               | 0.2278741               |
| antidep_rx_pre1y_cumulative | 0.0881055   | 0.0534026 | 1.65    | 0.0990  | -0.0165617              | 0.1927727               |
| benzo_rx_pre3m              | 0.340881    | 0.0334485 | 10.19   | 0.0000  | 0.2753232               | 0.4064388               |
| hypno_rx_pre3m              | 0.1163377   | 0.0587128 | 1.98    | 0.0480  | 0.0012627               | 0.2314127               |
| hypno_rx_pre5y_cumulative   | 0.0725226   | 0.0459855 | 1.58    | 0.1150  | -0.0176073              | 0.1626525               |
| sga_rx_pre1y_cumulative     | 0.1072703   | 0.0650683 | 1.65    | 0.0990  | -0.0202611              | 0.2348018               |
| sga_rx_pre5y_cumulative     | 0.1582301   | 0.0657477 | 2.41    | 0.0160  | 0.029367                | 0.2870933               |
| mh_ip_pre3m                 | 0.113767    | 0.0541248 | 2.1     | 0.0360  | 0.0076844               | 0.2198496               |
| mh_ip_pre1y_cumulative      | 0.1660328   | 0.0620335 | 2.68    | 0.0070  | 0.0444494               | 0.2876161               |
| mh_ip_pre5y_cumulative      | 0.2134675   | 0.0539905 | 3.95    | 0.0000  | 0.1076481               | 0.3192869               |
| mh_op_pre3m                 | 0.089926    | 0.0463842 | 1.94    | 0.0530  | -0.0009854              | 0.1808374               |
| mh_op_pre1y_cumulative      | 0.168969    | 0.0555262 | 3.04    | 0.0020  | 0.0601397               | 0.2777984               |
| mh_op_pre5y_cumulative      | -0.1065041  | 0.0533735 | -2      | 0.0460  | -0.2111142              | -0.001894               |
| mh_ed_pre3m                 | 0.2589882   | 0.0459584 | 5.64    | 0.0000  | 0.1689114               | 0.349065                |

|                                |            |           |       |        |            |            |
|--------------------------------|------------|-----------|-------|--------|------------|------------|
| mh_ed_pre1y_cumulative         | 0.2320369  | 0.0501834 | 4.62  | 0.0000 | 0.1336793  | 0.3303945  |
| mh_ed_pre5y_cumulative         | 0.0835463  | 0.0492232 | 1.7   | 0.0900 | -0.0129294 | 0.1800221  |
| any_sui_att_pre3m              | 0.4740714  | 0.0786359 | 6.03  | 0.0000 | 0.3199479  | 0.6281949  |
| any_sui_att_pre1y_cumulative   | 0.4714488  | 0.0875164 | 5.39  | 0.0000 | 0.2999198  | 0.6429778  |
| any_sui_att_pre5y_cumulative   | 1.668482   | 0.1674393 | 9.96  | 0.0000 | 1.340307   | 1.996657   |
| lvi_sui_att_pre5y_cumulative   | 0.1475331  | 0.0699558 | 2.11  | 0.0350 | 0.0104223  | 0.2846439  |
| any_inj_poi_pre3m              | 0.1329157  | 0.0442792 | 3     | 0.0030 | 0.04613    | 0.2197014  |
| any_inj_poi_pre1y_cumulative   | 0.2464229  | 0.050165  | 4.91  | 0.0000 | 0.1481014  | 0.3447445  |
| any_inj_poi_pre5y_cumulative   | -0.0830589 | 0.0413258 | -2.01 | 0.0440 | -0.164056  | -0.0020618 |
| any_sui_att_pre5y_cumulative_a | 0.0223427  | 0.0022036 | 10.14 | 0.0000 | 0.0180237  | 0.0266616  |
| charlson_score                 | -0.0997792 | 0.0402998 | -2.48 | 0.0130 | -0.1787654 | -0.0207929 |
| charlson_a                     | 0.0018103  | 0.0006339 | 2.86  | 0.0040 | 0.0005679  | 0.0030528  |
| charlson_cvd                   | 0.1381357  | 0.0707562 | 1.95  | 0.0510 | -0.0005439 | 0.2768153  |
| charlson_diab                  | -0.1207415 | 0.0524723 | -2.3  | 0.0210 | -0.2235853 | -0.0178977 |
| Raceasian                      | -0.1652086 | 0.0628224 | -2.63 | 0.0090 | -0.2883383 | -0.0420789 |
| Raceblack                      | -0.029999  | 0.1012188 | -0.3  | 0.7670 | -0.2283843 | 0.1683862  |
| Hispanic                       | -0.3205841 | 0.0417471 | -7.68 | 0.0000 | -0.4024069 | -0.2387614 |
| coll_deg_lt25p                 | -0.0356545 | 0.0306191 | -1.16 | 0.2440 | -0.0956668 | 0.0243578  |
| phqnumber90                    | 0.0055312  | 0.0285435 | 0.19  | 0.8460 | -0.050413  | 0.0614753  |
| phqnumber183                   | 0.0293979  | 0.0301467 | 0.98  | 0.3290 | -0.0296886 | 0.0884843  |
| phqnumber365                   | -0.0217082 | 0.0130881 | -1.66 | 0.0970 | -0.0473605 | 0.0039441  |
| phqmode365_2                   | 0.1220448  | 0.1382446 | 0.88  | 0.3770 | -0.1489095 | 0.3929992  |
| phqmax365_0                    | -0.0625263 | 0.0520418 | -1.2  | 0.2300 | -0.1645264 | 0.0394739  |
| phqmax365_1                    | 0.2185043  | 0.0671521 | 3.25  | 0.0010 | 0.0868887  | 0.35012    |
| phqmax365_2                    | 0.1852716  | 0.1315641 | 1.41  | 0.1590 | -0.0725894 | 0.4431325  |
| phqmax365_3                    | 0.4865901  | 0.0933256 | 5.21  | 0.0000 | 0.3036752  | 0.669505   |
| raceblack_de                   | -0.1041901 | 0.1107672 | -0.94 | 0.3470 | -0.3212899 | 0.1129096  |
| raceblack_an                   | -0.1074305 | 0.0966951 | -1.11 | 0.2670 | -0.2969495 | 0.0820884  |
| raceun_bi                      | 0.1497073  | 0.122312  | 1.22  | 0.2210 | -0.0900198 | 0.3894343  |
| hispanic_bi                    | 0.1359814  | 0.0927678 | 1.47  | 0.1430 | -0.0458402 | 0.317803   |
| dep_dx_pre5y_cumulative        | 1.718887   | 0.0891928 | 19.27 | 0.0000 | 1.544073   | 1.893702   |
| dep_dx_pre5y_cumulative_a      | -0.0119109 | 0.0018765 | -6.35 | 0.0000 | -0.0155888 | -0.0082331 |
| anx_dx_pre5y_cumulative        | 0.3794353  | 0.0849776 | 4.47  | 0.0000 | 0.2128823  | 0.5459883  |
| anx_dx_pre5y_cumulative_a      | 0.0013635  | 0.0016891 | 0.81  | 0.4200 | -0.0019471 | 0.004674   |
| bip_dx_pre5y_cumulative        | 0.1141705  | 0.1228579 | 0.93  | 0.3530 | -0.1266266 | 0.3549677  |
| bip_dx_pre5y_cumulative_f      | 0.1409446  | 0.0742368 | 1.9   | 0.0580 | -0.0045568 | 0.2864461  |
| bip_dx_pre5y_cumulative_a      | 0.005867   | 0.0023362 | 2.51  | 0.0120 | 0.0012882  | 0.0104458  |
| sch_dx_pre5y_cumulative_a      | -0.0005691 | 0.001835  | -0.31 | 0.7560 | -0.0041657 | 0.0030275  |
| oth_dx_pre5y_cumulative        | 0.2136741  | 0.0516036 | 4.14  | 0.0000 | 0.1125329  | 0.3148152  |
| dem_dx_pre5y_cumulative        | 0.0835573  | 0.0590086 | 1.42  | 0.1570 | -0.0320974 | 0.199212   |
| per_dx_pre5y_cumulative        | 0.443662   | 0.0811095 | 5.47  | 0.0000 | 0.2846903  | 0.6026336  |

|                                 |            |           |       |        |            |            |
|---------------------------------|------------|-----------|-------|--------|------------|------------|
| alc_dx_pre5y_cumulative         | 0.5796565  | 0.0866115 | 6.69  | 0.0000 | 0.4099011  | 0.7494119  |
| dru_dx_pre5y_cumulative         | 1.295697   | 0.060946  | 21.26 | 0.0000 | 1.176245   | 1.415149   |
| pts_dx_pre5y_cumulative         | 0.1123629  | 0.0480509 | 2.34  | 0.0190 | 0.0181848  | 0.2065409  |
| eat_dx_pre5y_cumulative         | 0.2631496  | 0.0678675 | 3.88  | 0.0000 | 0.1301317  | 0.3961675  |
| tbi_dx_pre5y_cumulative         | 0.1512429  | 0.0608175 | 2.49  | 0.0130 | 0.0320428  | 0.270443   |
| phq8_index_score_calc_f         | -0.0022386 | 0.0049678 | -0.45 | 0.6520 | -0.0119753 | 0.007498   |
| raceasian_8                     | 0.0202408  | 0.0096584 | 2.1   | 0.0360 | 0.0013107  | 0.0391709  |
| racein_8                        | 0.0063296  | 0.014912  | 0.42  | 0.6710 | -0.0228974 | 0.0355566  |
| hispanic_8                      | 0.0069394  | 0.0082141 | 0.84  | 0.3980 | -0.0091598 | 0.0230387  |
| age_8                           | 0.0004031  | 0.0001301 | 3.1   | 0.0020 | 0.0001481  | 0.000658   |
| q9_0_a                          | 0.0049376  | 0.002259  | 2.19  | 0.0290 | 0.0005101  | 0.0093651  |
| q9_1_8                          | 0.0141446  | 0.0065539 | 2.16  | 0.0310 | 0.0012992  | 0.02699    |
| q9_2_8                          | 0.0296125  | 0.007246  | 4.09  | 0.0000 | 0.0154105  | 0.0438145  |
| q9_3_8                          | 0.0542913  | 0.006972  | 7.79  | 0.0000 | 0.0406264  | 0.0679562  |
| q9_1_c                          | 0.0594748  | 0.0616585 | 0.96  | 0.3350 | -0.0613736 | 0.1803232  |
| q9_2_c                          | -0.0316618 | 0.0777477 | -0.41 | 0.6840 | -0.1840444 | 0.1207208  |
| q9_3_c                          | -0.218713  | 0.1072406 | -2.04 | 0.0410 | -0.4289007 | -0.0085252 |
| q9_0_de                         | -0.5715746 | 0.1047819 | -5.45 | 0.0000 | -0.7769434 | -0.3662058 |
| any_sui_att_pre5y_cumulative_8  | -0.0159464 | 0.0068935 | -2.31 | 0.0210 | -0.0294574 | -0.0024353 |
| any_sui_att_pre5y_cumulative_c  | -0.0143564 | 0.0237277 | -0.61 | 0.5450 | -0.0608618 | 0.0321491  |
| any_sui_att_pre5y_cumulative_de | -0.995897  | 0.1283282 | -7.76 | 0.0000 | -1.247416  | -0.7443784 |
| any_sui_att_pre5y_cumulative_an | -0.4112843 | 0.0839873 | -4.9  | 0.0000 | -0.5758965 | -0.2466722 |
| any_sui_att_pre5y_cumulative_bi | -0.2070626 | 0.0861377 | -2.4  | 0.0160 | -0.3758894 | -0.0382357 |
| any_sui_att_pre5y_cumulative_sc | 0.3432375  | 0.1314316 | 2.61  | 0.0090 | 0.0856363  | 0.6008386  |
| any_sui_att_pre5y_cumulative_al | -0.2630062 | 0.0997112 | -2.64 | 0.0080 | -0.4584365 | -0.0675759 |
| any_sui_att_pre5y_cumulative_dr | -0.4859498 | 0.086566  | -5.61 | 0.0000 | -0.655616  | -0.3162836 |
| any_sui_att_pre5y_cumulative_pe | -0.1867706 | 0.1032793 | -1.81 | 0.0710 | -0.3891943 | 0.0156531  |

APPENDIX 9D – COEFFICIENTS FOR PREDICTION OF SUICIDE DEATH IN 90 DAYS FOLLOWING MENTAL HEALTH SPECIALTY VISIT.

|                                | Coefficient | Std. Err. | Z score | p value | Lower 95%<br>Conf Limit | Upper 95%<br>Conf Limit |
|--------------------------------|-------------|-----------|---------|---------|-------------------------|-------------------------|
| Constant                       | -8.946025   | 0.2293034 | -39.01  | 0.0000  | -9.395451               | -8.496598               |
| ac1                            | -1.545886   | 0.3886519 | -3.98   | 0.0000  | -2.30763                | -0.7841423              |
| Medicare                       | -0.5708209  | 0.1987973 | -2.87   | 0.0040  | -0.9604565              | -0.1811853              |
| days_since_prev                | -0.0005089  | 0.0005031 | -1.01   | 0.3120  | -0.0014949              | 0.0004771               |
| Female                         | -0.7158009  | 0.284572  | -2.52   | 0.0120  | -1.273552               | -0.1580499              |
| dep_dx_pre5y                   | -0.3935343  | 0.1772138 | -2.22   | 0.0260  | -0.740867               | -0.0462016              |
| anx_dx_pre5y                   | -0.5247922  | 0.2006081 | -2.62   | 0.0090  | -0.9179769              | -0.1316075              |
| antidep_rx_pre3m               | 0.0776264   | 0.2050601 | 0.38    | 0.7050  | -0.3242841              | 0.4795369               |
| benzo_rx_pre3m                 | 0.6995959   | 0.1704775 | 4.1     | 0.0000  | 0.365466                | 1.033726                |
| hypno_rx_pre1y_cumulative      | 0.467845    | 0.1990773 | 2.35    | 0.0190  | 0.0776606               | 0.8580295               |
| sga_rx_pre5y_cumulative        | 0.4699488   | 0.1881668 | 2.5     | 0.0130  | 0.1011487               | 0.8387489               |
| mh_ip_pre3m                    | 0.2892493   | 0.2534952 | 1.14    | 0.2540  | -0.2075922              | 0.7860909               |
| mh_ip_pre1y_cumulative         | 0.180343    | 0.2969324 | 0.61    | 0.5440  | -0.4016338              | 0.7623198               |
| mh_ip_pre5y_cumulative         | 0.4432957   | 0.2762229 | 1.6     | 0.1090  | -0.0980912              | 0.9846826               |
| mh_ed_pre3m                    | 0.4700143   | 0.2319554 | 2.03    | 0.0430  | 0.01539                 | 0.9246386               |
| mh_ed_pre1y_cumulative         | 0.3527572   | 0.2072697 | 1.7     | 0.0890  | -0.053484               | 0.7589984               |
| any_sui_att_pre1y_cumulative   | 1.36854     | 0.4539192 | 3.01    | 0.0030  | 0.4788743               | 2.258205                |
| any_sui_att_pre5y_cumulative_a | -0.0000514  | 0.0110178 | 0       | 0.9960  | -0.021646               | 0.0215432               |
| charlson_a                     | -0.0005351  | 0.0011149 | -0.48   | 0.6310  | -0.0027202              | 0.00165                 |
| Raceblack                      | -1.465944   | 0.3898385 | -3.76   | 0.0000  | -2.230013               | -0.7018742              |
| Raceun                         | 0.6011625   | 0.474392  | 1.27    | 0.2050  | -0.3286287              | 1.530954                |
| Hispanic                       | -1.362098   | 0.2994398 | -4.55   | 0.0000  | -1.948989               | -0.7752066              |
| raceun_f                       | 0.7672085   | 0.426566  | 1.8     | 0.0720  | -0.0688454              | 1.603262                |
| raceun_de                      | 0.6380826   | 0.4739421 | 1.35    | 0.1780  | -0.2908269              | 1.566992                |
| dep_dx_pre5y_cumulative_a      | 0.0111731   | 0.0058094 | 1.92    | 0.0540  | -0.000213               | 0.0225592               |
| anx_dx_pre5y_cumulative_a      | 0.0064072   | 0.0043074 | 1.49    | 0.1370  | -0.0020351              | 0.0148496               |
| bip_dx_pre5y_cumulative_a      | 0.0042201   | 0.0042588 | 0.99    | 0.3220  | -0.0041269              | 0.0125671               |
| sch_dx_pre5y_cumulative_a      | -0.0112257  | 0.0053196 | -2.11   | 0.0350  | -0.0216519              | -0.0007995              |
| alc_dx_pre5y_cumulative        | 0.1592071   | 0.2320504 | 0.69    | 0.4930  | -0.2956033              | 0.6140175               |
| phq8_missing_f                 | -0.5062722  | 0.308586  | -1.64   | 0.1010  | -1.11109                | 0.0985452               |
| raceasian_8                    | 0.0241234   | 0.0310524 | 0.78    | 0.4370  | -0.0367382              | 0.084985                |
| raceblack_8                    | -0.0776751  | 0.0670778 | -1.16   | 0.2470  | -0.2091453              | 0.0537951               |
| racein_8                       | -0.1020686  | 0.0656522 | -1.55   | 0.1200  | -0.2307445              | 0.0266073               |
| raceun_8                       | -0.0564359  | 0.0324313 | -1.74   | 0.0820  | -0.12                   | 0.0071283               |
| age_8                          | 0.000565    | 0.0004832 | 1.17    | 0.2420  | -0.000382               | 0.001512                |

|                                |            |           |       |        |            |           |
|--------------------------------|------------|-----------|-------|--------|------------|-----------|
| q9_0_a                         | -0.0047322 | 0.0050601 | -0.94 | 0.3500 | -0.0146497 | 0.0051854 |
| q9_1_a                         | 0.0125815  | 0.0075659 | 1.66  | 0.0960 | -0.0022473 | 0.0274104 |
| q9_2_a                         | 0.0079878  | 0.0098744 | 0.81  | 0.4190 | -0.0113658 | 0.0273413 |
| q9_3_a                         | 0.0035114  | 0.0144209 | 0.24  | 0.8080 | -0.024753  | 0.0317759 |
| q9_0_8                         | -0.0365011 | 0.0255099 | -1.43 | 0.1520 | -0.0864995 | 0.0134973 |
| q9_3_8                         | 0.0551443  | 0.0386544 | 1.43  | 0.1540 | -0.0206169 | 0.1309055 |
| q9_3_c                         | -0.1787875 | 0.1812216 | -0.99 | 0.3240 | -0.5339753 | 0.1764002 |
| any_sui_att_pre5y_cumulative_8 | -0.0343006 | 0.0251448 | -1.36 | 0.1730 | -0.0835836 | 0.0149824 |
| any_sui_att_pre5y_cumulative_c | 0.0103636  | 0.2293594 | 0.05  | 0.9640 | -0.4391726 | 0.4598998 |

APPENDIX 9E – SELECTED PREDICTORS AND COEFFICIENTS FOR PREDICTION OF SUICIDE DEATH IN 90 DAYS FOLLOWING PRIMARY CARE VISIT WITH MENTAL HEALTH DIAGNOSIS.

|                                | Coefficient | Std. Err. | Z score | p value | Lower 95%<br>Conf Limit | Upper 95%<br>Conf Limit |
|--------------------------------|-------------|-----------|---------|---------|-------------------------|-------------------------|
| Constant                       | -9.160812   | 0.118435  | -77.35  | 0.0000  | -9.392941               | -8.928684               |
| Medicare                       | -0.4024572  | 0.1726079 | -2.33   | 0.0200  | -0.7407626              | -0.0641519              |
| days_since_prev                | -0.001533   | 0.000458  | -3.35   | 0.0010  | -0.0024306              | -0.0006354              |
| Female                         | -1.452239   | 0.1277421 | -11.37  | 0.0000  | -1.702609               | -1.201869               |
| benzo_rx_pre3m                 | 0.5385625   | 0.1728869 | 3.12    | 0.0020  | 0.1997104               | 0.8774145               |
| mh_ip_pre3m                    | 0.2818673   | 0.206991  | 1.36    | 0.1730  | -0.1238276              | 0.6875623               |
| mh_ip_pre1y_cumulative         | 0.3160587   | 0.191463  | 1.65    | 0.0990  | -0.0592019              | 0.6913192               |
| mh_ed_pre3m                    | 0.6988312   | 0.2272503 | 3.08    | 0.0020  | 0.2534287               | 1.144234                |
| mh_ed_pre1y_cumulative         | 0.0190551   | 0.2236506 | 0.09    | 0.9320  | -0.419292               | 0.4574021               |
| any_inj_poi_pre1y_cumulative   | 0.2420071   | 0.2263733 | 1.07    | 0.2850  | -0.2016764              | 0.6856906               |
| any_sui_att_pre5y_cumulative_a | 0.0240631   | 0.0050371 | 4.78    | 0.0000  | 0.0141906               | 0.0339356               |
| charlson_score                 | -0.0602928  | 0.038337  | -1.57   | 0.1160  | -0.1354319              | 0.0148464               |
| Hispanic                       | -1.842608   | 0.359839  | -5.12   | 0.0000  | -2.54788                | -1.137337               |
| phqnumber90                    | 0.0022517   | 0.0535383 | 0.04    | 0.9660  | -0.1026815              | 0.1071849               |
| raceun_de                      | 0.8959889   | 0.2779327 | 3.22    | 0.0010  | 0.3512507               | 1.440727                |
| raceun_an                      | 0.8135118   | 0.3997291 | 2.04    | 0.0420  | 0.0300571               | 1.596966                |
| dep_dx_pre5y_cumulative        | 0.497053    | 0.2942677 | 1.69    | 0.0910  | -0.079701               | 1.073807                |
| dep_dx_pre5y_cumulative_a      | 0.0072638   | 0.0055019 | 1.32    | 0.1870  | -0.0035198              | 0.0180473               |
| anx_dx_pre5y_cumulative        | 0.1735233   | 0.1362331 | 1.27    | 0.2030  | -0.0934886              | 0.4405352               |
| bip_dx_pre5y_cumulative_a      | 0.0103087   | 0.0045761 | 2.25    | 0.0240  | 0.0013398               | 0.0192776               |
| alc_dx_pre5y_cumulative        | 0.5644535   | 0.3186114 | 1.77    | 0.0760  | -0.0600135              | 1.18892                 |
| raceasian_8                    | 0.0354654   | 0.0291877 | 1.22    | 0.2240  | -0.0217414              | 0.0926722               |
| racemuot_8                     | 0.0782259   | 0.0378627 | 2.07    | 0.0390  | 0.0040165               | 0.1524354               |
| age_8                          | 0.0005279   | 0.0003053 | 1.73    | 0.0840  | -0.0000706              | 0.0011263               |
| q9_2_a                         | 0.0166789   | 0.0090063 | 1.85    | 0.0640  | -0.0009731              | 0.034331                |
| q9_3_a                         | 0.0254827   | 0.0137783 | 1.85    | 0.0640  | -0.0015223              | 0.0524877               |
| q9_1_8                         | 0.0455625   | 0.0183142 | 2.49    | 0.0130  | 0.0096672               | 0.0814577               |
| q9_3_8                         | 0.0163483   | 0.0390113 | 0.42    | 0.6750  | -0.0601123              | 0.092809                |
| any_sui_att_pre5y_cumulative_8 | -0.0314048  | 0.032474  | -0.97   | 0.3340  | -0.0950528              | 0.0322431               |
| any_sui_att_pre5y_cumulative_c | -0.0499144  | 0.128846  | -0.39   | 0.6980  | -0.3024479              | 0.2026191               |
